# Supplementary material
Source: Springer Nature journal article supplement (https://www.springermedizin.de/resource/supplementary/12884_2014_1062_MOESM1_ESM.pdf/9458804)
Supplement: MOESM1 [file 9458804]

### *Influence of uncertainties*

I think I have always taken the view that it will be better not to drink at all than be unsure about what amount is safe (M11).

### *Scepticism*

Certainly as a midwife I will probably join in and say, how come women in other countries drink and they don't suffer from alcohol and here in Britain they are giving mixed messages to women saying don't drink alcohol at all because it might have an effect on the baby (M9).
